# Supplementary material
Source: Springer Nature journal article supplement (https://www.springermedizin.de/resource/supplementary/12936_2012_2167_MOESM7_ESM.pdf/9542856)
Supplement: MOESM7 [file 9542856]

QT-NASBA

RT-PCR

a)

b)

% successful amplification

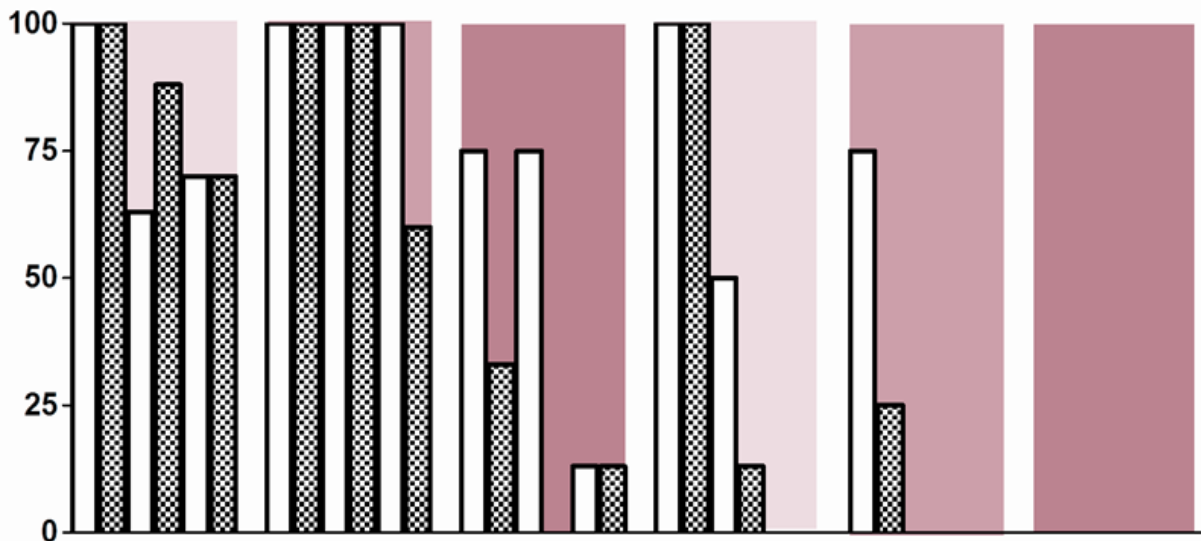

|                        |       |   |     |      |   |     |      |   |     |       |   |     |      |   |     |      |  |  |
|------------------------|-------|---|-----|------|---|-----|------|---|-----|-------|---|-----|------|---|-----|------|--|--|
| gametocyte density/µl  | 10    | 1 | 0.1 | 10   | 1 | 0.1 | 10   | 1 | 0.1 | 10    | 1 | 0.1 | 10   | 1 | 0.1 |      |  |  |
| filter paper           | 903   |   |     | 903  |   |     | 903  |   |     | FTA   |   |     | FTA  |   |     | FTA  |  |  |
| week 1 temperature     | 35°C  |   |     | 35°C |   |     | 35°C |   |     | 35°C  |   |     | 35°C |   |     | 35°C |  |  |
| subsequent temperature | -20°C |   |     | 35°C |   |     | 35°C |   |     | -20°C |   |     | 35°C |   |     | 35°C |  |  |
| wet/dry                | dry   |   |     | dry  |   |     | wet  |   |     | dry   |   |     | dry  |   |     | wet  |  |  |
